# Supplementary material
Source: MDPI journal article supplement (https://www.mdpi.com/2223-7747/13/10/1389)
Supplement: s1 [file s1]

Archive with 3 entries (3 files):
- Supplementary Materials.pdf
- Video S1_nosupport.mp4
- Video S2_support.mp4
