# Supplementary material for: Ascent and Attachment in Pea Plants: A Matter of Iteration
Source: MDPI journal article supplement (doi:10.3390/plants13101389), 2024-05-16
Supplement: s1 [file s1 › Supplementary Materials.pdf]

Supplementary information

# Ascent and Attachment in Pea Plants: A Matter of Iteration

**Silvia Guerra \***, Giovanni Bruno, Andrea Spoto, Anna Panzeri, Qiuran Wang, Bianca Bonato,  
Valentina Simonetti and Umberto Castiello

Department of General Psychology, University of Padova, 35131 Padova, Italy

\* Correspondence: [silvia.guerra@unipd.it](mailto:silvia.guerra@unipd.it); Tel.: +39-049-827-1216

The file contains:

- Supplementary Figures S1 – S3
- Supplementary Tables S1 – S5

**Table S1A.** Mean and standard deviation for the average velocity and acceleration profile of circumnutation, distance from the origin of the plant to the center of circumnutation, and area of circumnutation concerning Experimental condition ('Support,' 'No Support') and Experimental Phase ('PRE,' 'POST').

|                              | Velocity    | Acceleration  | Distance    | Area        |
|------------------------------|-------------|---------------|-------------|-------------|
| <b>Condition: Support</b>    |             |               |             |             |
| - PRE                        | .296 (.258) | .0023 (.0040) | 8.43 (7.52) | 26.4 (53.3) |
| - POST                       | .753 (.659) | .0059 (.0102) | 18.8 (15.2) | 210 (457)   |
| <b>Condition: No Support</b> |             |               |             |             |
| - PRE                        | .210 (.160) | .0023 (.0028) | 5.21 (3.42) | 7.58 (17.3) |
| - POST                       | .418 (.387) | .0036 (.0055) | 10.7 (7.00) | 55.9 (131)  |

**Table S1B.** Results from the lmer fitted models (Type III Wald chi-square tests) investigating the interaction between Experimental Condition ('Support,' 'No Support') and Experimental Phase ('PRE,' 'POST') for the four kinematical variables considered (scaled). Plant and Experimental Conditions were set as random intercept and random slope variables.

|                              | $\chi^2$ | df | Pr(> $\chi^2$ ) | R <sup>2</sup> |
|------------------------------|----------|----|-----------------|----------------|
| <b>Velocity ~</b>            |          |    |                 |                |
| (Intercept)                  | 9.688    | 1  | .001**          |                |
| Condition                    | 8.614    | 1  | .003**          |                |
| Phase                        | 730.214  | 1  | <.001***        |                |
| Phase*Condition              | 52.055   | 1  | <.001***        |                |
| - Marginal R <sup>2</sup>    |          |    |                 | .186           |
| - Conditional R <sup>2</sup> |          |    |                 | .479           |
| <b>Acceleration ~</b>        |          |    |                 |                |
| (Intercept)                  | 2.804    | 1  | .093°           |                |
| Condition                    | .008     | 1  | .099°           |                |
| Phase                        | 109.252  | 1  | <.001***        |                |
| Phase*Condition              | 9.390    | 1  | .002**          |                |
| - Marginal R <sup>2</sup>    |          |    |                 | .038           |
| - Conditional R <sup>2</sup> |          |    |                 | .181           |
| <b>Distance ~</b>            |          |    |                 |                |
| (Intercept)                  | 18.725   | 1  | <.001***        |                |
| Condition                    | 20.449   | 1  | <.001***        |                |
| Phase                        | 478.877  | 1  | <.001***        |                |
| Phase*Condition              | 35.519   | 1  | <.001***        |                |
| - Marginal R <sup>2</sup>    |          |    |                 | .175           |
| - Conditional R <sup>2</sup> |          |    |                 | .325           |
| <b>Area ~</b>                |          |    |                 |                |
| (Intercept)                  | 11.842   | 1  | <.001***        |                |
| Condition                    | 17.896   | 1  | <.001***        |                |
| Phase                        | 235.725  | 1  | <.001***        |                |
| Phase*Condition              | 42.041   | 1  | <.001***        |                |
| - Marginal R <sup>2</sup>    |          |    |                 | .089           |
| - Conditional R <sup>2</sup> |          |    |                 | .201           |

**Note.**  $\chi^2$  = Chi-squared test; R<sup>2</sup> = Coefficient of determination; df = Degrees of Freedom. N observations = 3117. ° =  $p < .100$ ; \* =  $p < .050$ ; \*\* =  $p < .010$ ; \*\*\* =  $p < .001$ .

**Table S1C.** Post-hoc analysis (“emmeans” contrast) on the significant interaction effects (Experimental Condition\*Experimental Phase) detected in the previous four models.

|                       | <b>estimate</b> | <b>SE</b> | <b>df</b> | <b>Z ratio</b> | <b>p-value</b> |
|-----------------------|-----------------|-----------|-----------|----------------|----------------|
| <b>Velocity ~</b>     |                 |           |           |                |                |
| Sup PRE – Sup POST    | -.946           | .206      | Inf       | -27.022        | <.001          |
| No PRE – No POST      | -.524           | .049      | Inf       | -11.185        | <.001          |
| Sup PRE – No PRE      | .184            | .209      | Inf       | .881           | .814           |
| Sup POST – No POST    | .606            | .206      | Inf       | 2.935          | .017           |
| <b>Acceleration ~</b> |                 |           |           |                |                |
| Sup PRE – Sup POST    | -.450           | .142      | Inf       | -10.452        | <.001          |
| No PRE – No POST      | -.229           | .043      | Inf       | -3.991         | <.001          |
| Sup PRE – No PRE      | .014            | .057      | Inf       | .093           | .999           |
| Sup POST – No POST    | .233            | .142      | Inf       | 1.646          | .353           |
| <b>Distance ~</b>     |                 |           |           |                |                |
| Sup PRE – Sup POST    | -.862           | .039      | Inf       | -21.883        | <.001          |
| No PRE – No POST      | -.470           | .052      | Inf       | -8.920         | <.001          |
| Sup PRE – No PRE      | .259            | .149      | Inf       | 1.738          | .304           |
| Sup POST – No POST    | .651            | .144      | Inf       | 4.522          | <.001          |
| <b>Area ~</b>         |                 |           |           |                |                |
| Sup PRE – Sup POST    | -.665           | .043      | Inf       | -4.230         | <.001          |
| No PRE – No POST      | -.197           | .058      | Inf       | -3.417         | .003           |
| Sup PRE – No PRE      | .044            | .128      | Inf       | .346           | .986           |
| Sup POST – No POST    | -.512           | .121      | Inf       | 4.230          | <.001          |

*Note.* Sup PRE = Support, PRE phase; Sup POST = Support, POST phase; No PRE = No Support, PRE phase; No POST = No Support, POST phase. SE = Standard Error, df = Degrees of Freedom.

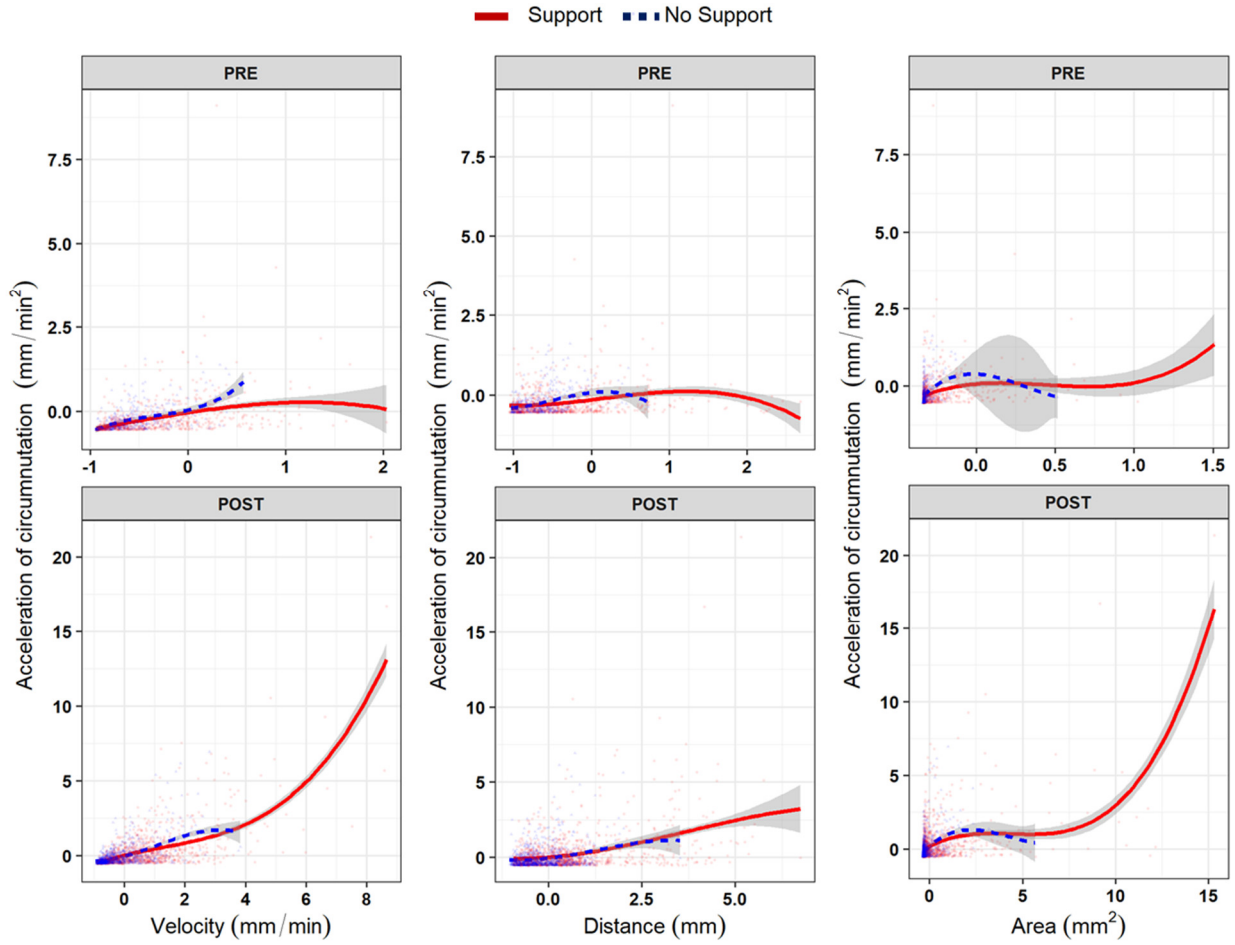

**Figure S1A.** B-spline curves (degrees of freedom = 3) for the non-linear relationship across Experimental Phases (row facets) between the acceleration of circumnutation (as the scaled dependent variable, y axes) and the other three kinematic variables (column facets): the average velocity of circumnutation, distance from the origin of the plant to the center of circumnutation and area of circumnutation. Data represent the sole activity of the apex of the plant. The red solid line represents the 'Support' condition, and the blue dashed line represents the 'No Support' condition.

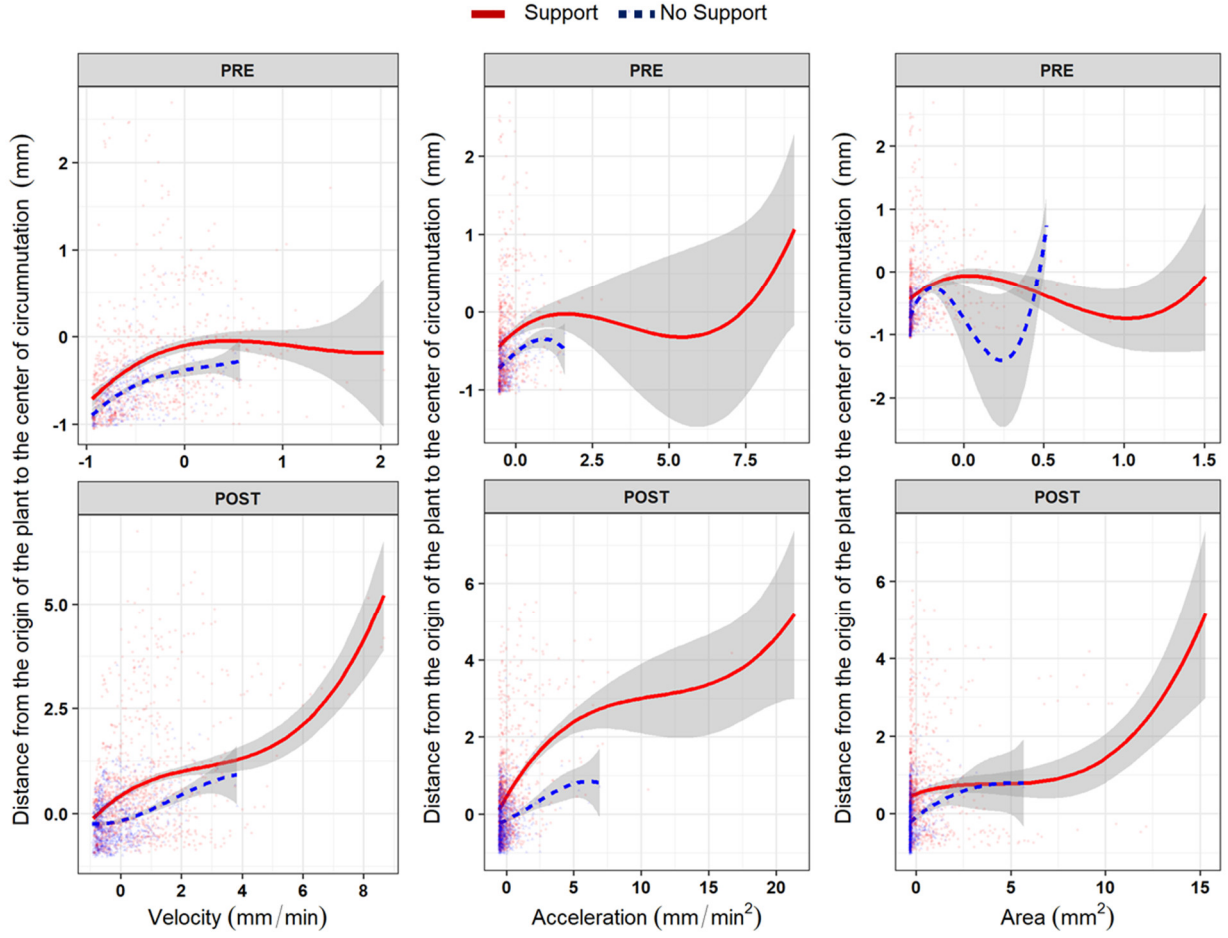

**Figure S1B.** B-spline curves (degrees of freedom = 3) for the non-linear relationship across Experimental Phases (row facets) between the distance from the origin of the plant to the center of circumnutation (as the scaled dependent variable, y axes) and the other three kinematic variables (column facets): the average velocity of circumnutation, acceleration of circumnutation and area of circumnutation. Data represent the sole activity of the apex of the plant. The red solid line represents the 'Support' condition, and the blue dashed line represents the 'No Support' condition.

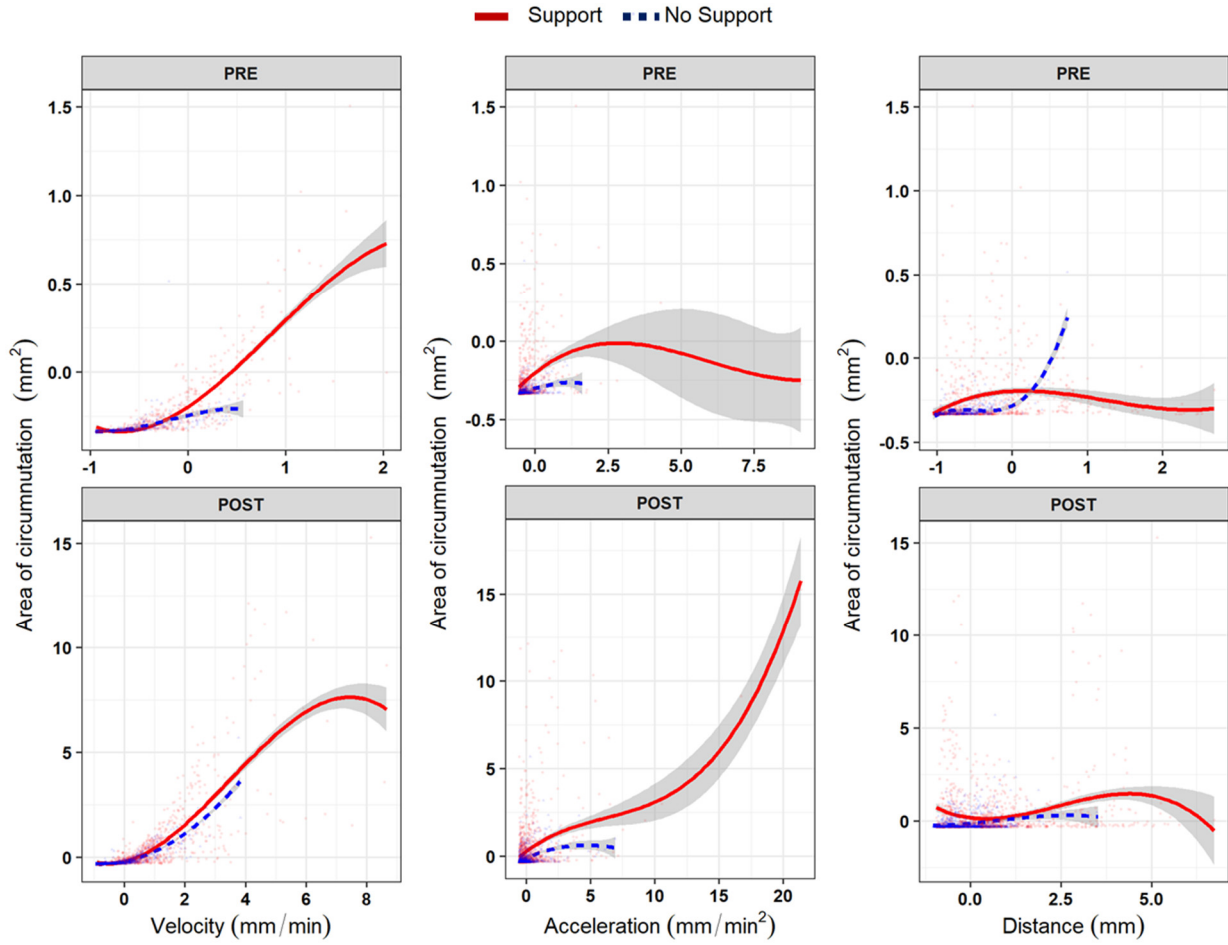

**Figure S1C.** B-spline curves (degrees of freedom = 3) for the non-linear relationship across Experimental Phases (row facets) between an area of circumnutation (as the scaled dependent variable, y axes) and the other three kinematic variables (column facets): the average velocity of circumnutation, acceleration of circumnutation and distance from the origin of the plant to the center of the circumnutation. Data represent the sole activity of the apex of the plant. The red solid line defines the 'Support' condition, and the blue dashed line represents the 'No Support' condition.

**Table S2A.** Results from the generative additive model setting the average velocity of circumnutation as the dependent variable (scaled) and the other three kinematic variables as smoothed terms for the interaction between Experimental Condition ('Support,' 'No Support') and Experimental Phase ('PRE,' 'POST'). The plant was set as a random smoothed intercept.

| <i>Parametric coefficients</i>                  | <b>Estimate</b> | <b>SE</b>     | <b>t value</b> | <b>Pr(&gt; t )</b> |
|-------------------------------------------------|-----------------|---------------|----------------|--------------------|
| (Intercept)                                     | 0.506           | .025          | 20.21          | <.001***           |
| <i>Approximate significance of smooth terms</i> | <b>edf</b>      | <b>Ref.df</b> | <b>F value</b> | <b>p-value</b>     |
| s(Area): Stim PRE                               | 4.701           | 4.919         | 227.758        | <.001***           |
| s(Area): Stim POST                              | 8.187           | 8.679         | 633.155        | <.001***           |
| s(Area): No PRE                                 | 2.952           | 2.992         | 36.342         | <.001***           |
| s(Area): No POST                                | 6.001           | 6.304         | 291.224        | <.001***           |
| s(Distance): Stim PRE                           | 2.648           | 3.282         | 3.273          | .021*              |
| s(Distance): Stim POST                          | 1.002           | 1.003         | 219.425        | <.001***           |
| s(Distance): No PRE                             | 2.718           | 3.114         | 1.380          | .368               |
| s(Distance): No POST                            | 3.682           | 4.490         | 8.053          | <.001***           |
| s(Acceleration): Stim PRE                       | 3.655           | 4.361         | 11.304         | <.001***           |
| s(Acceleration): Stim POST                      | 7.961           | 8.625         | 68.015         | <.001***           |
| s(Acceleration): No PRE                         | 1.000           | 1.001         | 20.574         | <.001***           |
| s(Acceleration): No POST                        | 2.162           | 2.681         | 31.639         | <.001***           |
| s (ID Plant) as random effect                   | 22.045          | 23.00         | 43.919         | <.001***           |

Adjusted R<sup>2</sup>= .898

**Note.** SE = Standard Error, edf = effective degrees of freedom (as an index of smoothness complexity); Ref.df = reference degrees of freedom. Sup PRE = Support, PRE phase; Sup POST = Support, POST phase; No PRE = No Support, PRE phase; No POST = No Support, POST phase. N observations = 3115. ° =  $p < .100$ ; \* =  $p < .050$ ; \*\* =  $p < .010$ ; \*\*\* =  $p < .001$ .

**Table S2B.** Results from the generative additive model setting acceleration of circumnutation as dependent variable (scaled) and the other three kinematic variables as smoothed terms, controlling for the interaction between Experimental Condition ('Support,' 'No Support') and Experimental Phase ('PRE,' 'POST'). The plant was set as a random smoothed intercept.

| <i>Parametric coefficients</i>                  | <b>Estimate</b> | <b>SE</b>     | <b>t value</b> | <b>Pr(&gt; t )</b> |
|-------------------------------------------------|-----------------|---------------|----------------|--------------------|
| (Intercept)                                     | .004            | .001          | 18.8           | <.001***           |
| <i>Approximate significance of smooth terms</i> | <b>edf</b>      | <b>Ref.df</b> | <b>F value</b> | <b>p-value</b>     |
| s(Area): Stim PRE                               | 2.570           | 3.029         | 3.524          | .014*              |
| s(Area): Stim POST                              | 8.622           | 8.952         | 43.971         | <.001***           |
| s(Area): No PRE                                 | 1.002           | 1.003         | 4.200          | .040*              |
| s(Area): No POST                                | 1.939           | 2.415         | 14.509         | <.001***           |
| s(Distance): Stim PRE                           | 1.007           | 1.014         | 0.323          | .571               |
| s(Distance): Stim POST                          | 2.112           | 2.653         | 15.463         | <.001***           |
| s(Distance): No PRE                             | 1.004           | 1.007         | 0.362          | .230               |
| s(Distance): No POST                            | 1.004           | 1.007         | 0.362          | .230               |
| s(Speed): Stim PRE                              | 2.590           | 3.237         | 1.398          | <.001***           |
| s(Speed): Stim POST                             | 1.460           | 1.784         | 28.687         | <.001***           |
| s(Speed): No PRE                                | 7.726           | 8.560         | 73.285         | <.001***           |
| s(Speed): No POST                               | 1.003           | 1.006         | 24.233         | <.001***           |
| s (ID Plant) as random effect                   | 5.200           | 6.086         | 26.770         | <.001***           |
|                                                 | 14.761          | 23.000        | 1.906          |                    |
| Adjusted R <sup>2</sup> = .542                  |                 |               |                |                    |

**Note.** SE = Standard Error, edf = effective degrees of freedom (as an index of smoothness complexity); Ref.df = reference degrees of freedom. Sup PRE = Support & PRE phase; Sup POST = Support & POST phase; No PRE = No Support & PRE phase; No POST = No Support & POST phase. N observations = 3115. ° =  $p < .100$ ; \* =  $p < .050$ ; \*\* =  $p < .010$ ; \*\*\* =  $p < .001$ .

**Table S2C.** Results from the generative additive model setting distance from the origin of the plant to the center of circumnutation as dependent variable (scaled) and the other three kinematic variables as smoothed terms, controlling for the interaction between Experimental Condition ('Support,' 'No Support') and Experimental Phase ('PRE,' 'POST'). The plant was set as a random smoothed intercept.

| <i>Parametric coefficients</i>                  | <b>Estimate</b> | <b>SE</b>     | <b>t value</b> | <b>Pr(&gt; t )</b> |
|-------------------------------------------------|-----------------|---------------|----------------|--------------------|
| (Intercept)                                     | 103.39          | 12.15         | 8.51           | <.001***           |
| <i>Approximate significance of smooth terms</i> | <b>edf</b>      | <b>Ref.df</b> | <b>F value</b> | <b>p-value</b>     |
| s(Speed): Stim PRE                              | 3.699           | 4.486         | 28.116         | <.001***           |
| s(Speed): Stim POST                             | 8.846           | 8.991         | 638.615        | <.001***           |
| s(Speed): No PRE                                | 1.008           | 1.013         | 1.131          | .289               |
| s(Speed): No POST                               | 4.526           | 5.430         | 83.980         | <.001***           |
| s(Distance): Stim PRE                           | 1.003           | 1.006         | 22.027         | <.001***           |
| s(Distance): Stim POST                          | 8.152           | 8.781         | 16.965         | .003**             |
| s(Distance): No PRE                             | 2.349           | 2.848         | 4.914          | .279               |
| s(Distance): No POST                            | 1.011           | 1.022         | 1.185          | .611               |
| s(Acceleration): Stim PRE                       | 1.497           | 1.818         | 0.377          | <.001***           |
| s(Acceleration): Stim POST                      | 8.680           | 8.966         | 85.308         | .769               |
| s(Acceleration): No PRE                         | 1.006           | 1.011         | 0.093          | .018*              |
| s(Acceleration): No POST                        | 1.880           | 2.339         | 3.783          | <.001***           |
| s (ID Plant) as random effect                   | 21.728          | 23.000        | 17.321         |                    |
| Adjusted R <sup>2</sup> = .787                  |                 |               |                |                    |

**Note.** SE = Standard Error, edf = effective degrees of freedom (as an index of smoothness complexity); Ref.df = reference degrees of freedom. Sup PRE = Support & PRE phase; Sup POST = Support & POST phase; No PRE = No Support & PRE phase; No POST = No Support & POST phase. N observations = 3115. ° =  $p < .100$ ; \* =  $p < .050$ ; \*\* =  $p < .010$ ; \*\*\* =  $p < .001$ .

**Table S2D.** Results from the generative additive model setting area of circumnutation as dependent variable (scaled) and the other three kinematic variables as smoothed terms, controlling for the interaction between Experimental Condition ('Support,' 'No Support') and Experimental Phase ('PRE,' 'POST'). The plant was set as a random smoothed intercept.

| <i>Parametric coefficients</i>                  | <b>Estimate</b> | <b>SE</b>     | <b>t value</b> | <b>Pr(&gt; t )</b> |
|-------------------------------------------------|-----------------|---------------|----------------|--------------------|
| (Intercept)                                     | 14.033          | 1.051         | 13.35          | <.001***           |
| <i>Approximate significance of smooth terms</i> | <b>edf</b>      | <b>Ref.df</b> | <b>F value</b> | <b>p-value</b>     |
| s(Speed): Stim PRE                              | 3.179           | 3.864         | 24.508         | <.001***           |
| s(Speed): Stim POST                             | 6.825           | 7.917         | 34.495         | <.001***           |
| s(Speed): No PRE                                | 2.334           | 2.906         | 1.043          | .280               |
| s(Speed): No POST                               | 1.776           | 2.252         | 11.487         | <.001***           |
| s(Area): Stim PRE                               | 3.294           | 3.702         | 9.130          | <.001***           |
| s(Area): Stim POST                              | 8.149           | 8.715         | 14.546         | .012*              |
| s(Area): No PRE                                 | 1.000           | 1.001         | 6.307          | .135               |
| s(Area): No POST                                | 1.684           | 2.071         | 1.977          | .822               |
| s(Acceleration): Stim PRE                       | 1.010           | 1.019         | 0.057          | <.001***           |
| s(Acceleration): Stim POST                      | 5.680           | 6.731         | 8.425          | .789               |
| s(Acceleration): No PRE                         | 1.002           | 1.004         | 0.074          | .141               |
| s(Acceleration): No POST                        | 1.004           | 1.008         | 2.152          | <.001***           |
| s (ID Plant) as random effect                   | 22.381          | 23.000        | 33.278         |                    |
| Adjusted R <sup>2</sup> = .468                  |                 |               |                |                    |

**Note.** SE = Standard Error, edf = effective degrees of freedom (as an index of smoothness complexity); Ref.df = reference degrees of freedom. Sup PRE = Support & PRE phase; Sup POST = Support & POST phase; No PRE = No Support & PRE phase; No POST = No Support & POST phase. N observations = 3115. ° =  $p < .100$ ; \* =  $p < .050$ ; \*\* =  $p < .010$ ; \*\*\* =  $p < .001$ .

**Table S3A.** Results from the lmer fitted models (Type III Wald chi-square tests) investigating the three-parties interaction between Experimental Condition ('Support,' 'No Support') and anatomical landmark of the plant ('Apex,' 'Tendril') throughout Leaf ('Third last,' 'Second last,' 'Last') for the four kinematical variables considered (scaled). The plant was set as a random intercept for each model.

|                              | $\chi^2$ | df | Pr(> $\chi^2$ ) | R <sup>2</sup> |
|------------------------------|----------|----|-----------------|----------------|
| <b>Velocity ~</b>            |          |    |                 |                |
| (Intercept)                  | 4.32     | 1  | .037**          |                |
| Condition: Point: Leaf       | 4017.53  | 11 | <.001***        |                |
| - Marginal R <sup>2</sup>    |          |    |                 | .323           |
| - Conditional R <sup>2</sup> |          |    |                 | .588           |
| <b>Acceleration ~</b>        |          |    |                 |                |
| (Intercept)                  | 7.12     | 1  | .007*           |                |
| Condition: Point: Leaf       | 895.68   | 11 | <.001***        |                |
| - Marginal R <sup>2</sup>    |          |    |                 | .125           |
| - Conditional R <sup>2</sup> |          |    |                 | .260           |
| <b>Distance ~</b>            |          |    |                 |                |
| (Intercept)                  | 16.84    | 1  | <.001***        |                |
| Condition: Point: Leaf       | 1207.36  | 11 | <.001***        |                |
| - Marginal R <sup>2</sup>    |          |    |                 | .166           |
| - Conditional R <sup>2</sup> |          |    |                 | .320           |
| <b>Area ~</b>                |          |    |                 |                |
| (Intercept)                  | .051     | 1  | .821            |                |
| Condition: Point: Leaf       | 1302.22  | 11 | <.001***        |                |
| - Marginal R <sup>2</sup>    |          |    |                 | .164           |
| - Conditional R <sup>2</sup> |          |    |                 | .406           |

**Note.**  $\chi^2$  = Chi-squared test; R<sup>2</sup> = Coefficient of determination; df = Degrees of Freedom. ° =  $p < .100$ ; \* =  $p < .050$ ; \*\* =  $p < .010$ ; \*\*\* =  $p < .001$ .

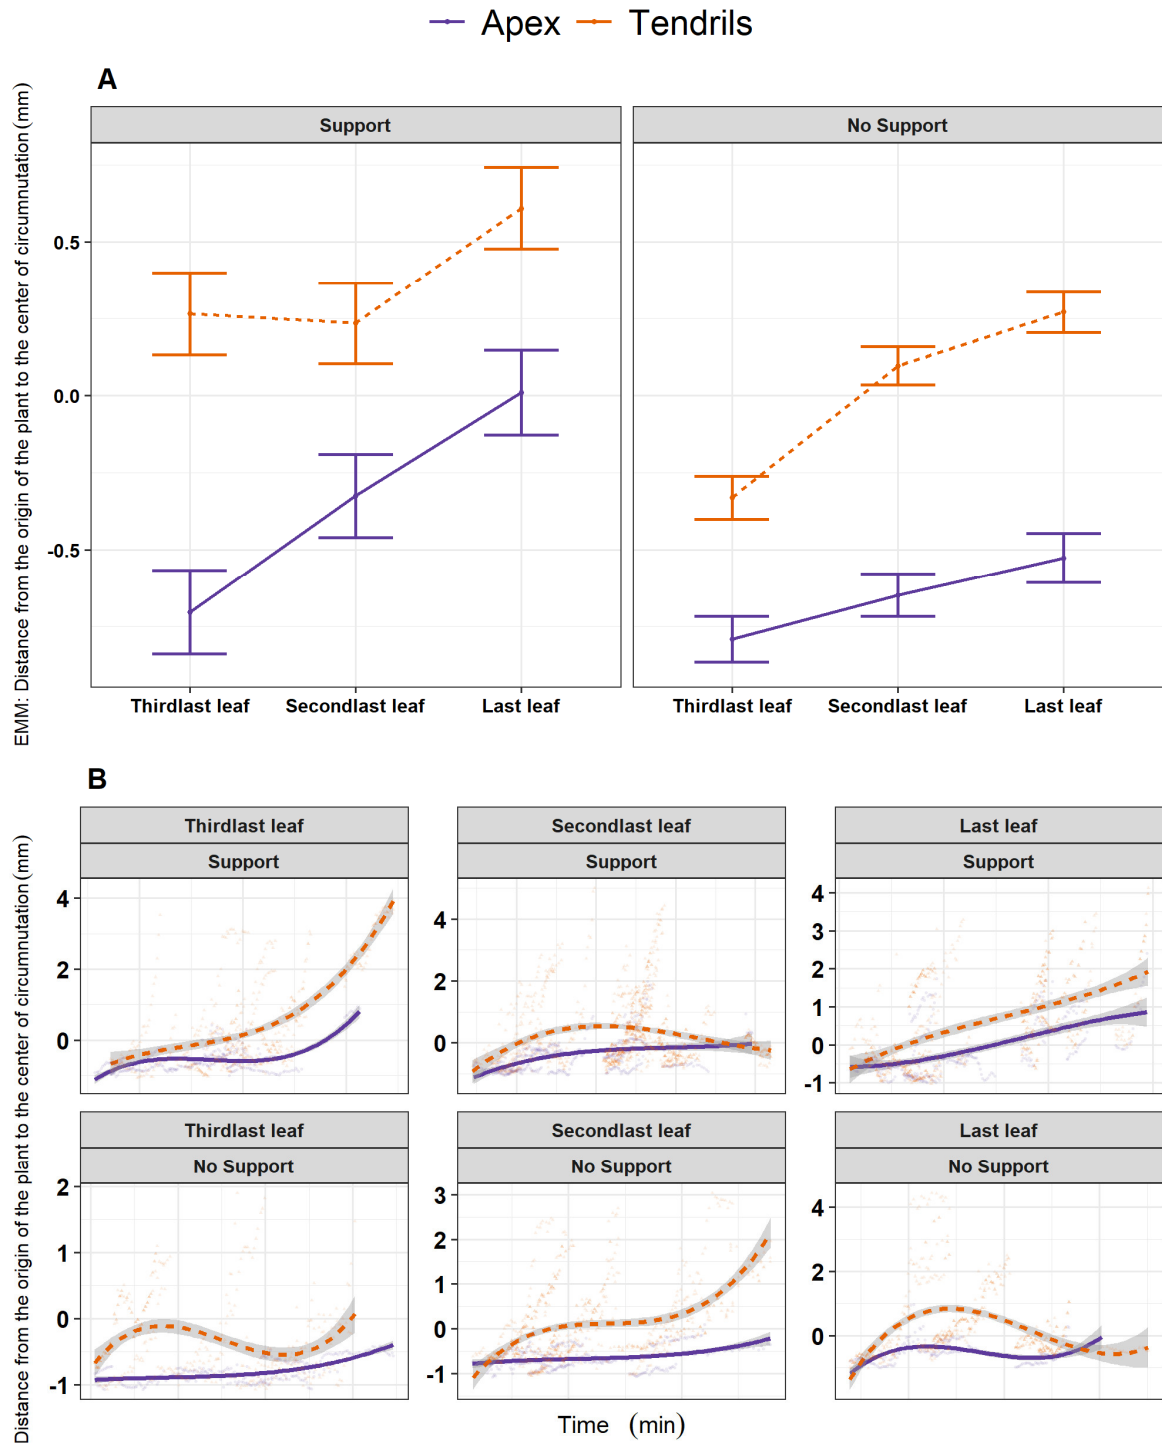

**Figure S2A. (A)** Graphical representation of post-hoc analysis for the interaction between Experimental Condition ('Stimulus,' 'No Stimulus'), anatomical landmark of the plant ('Apex,' 'Tendrils') and Leaf ('Third last,' 'Second last,' 'Last') for the estimation of the distance from the origin of the plant to the center of circumnutation (scaled) in the 'Third last,' 'Second last' and 'Last' leaf. **(B)** For descriptive purposes, the distribution of the same kinematical variable is represented as smoothed across the three last leaves of interest, controlling for the same experimental factors. Tendrils are represented with the orange-dashed line and the apex with the violet-solid line.

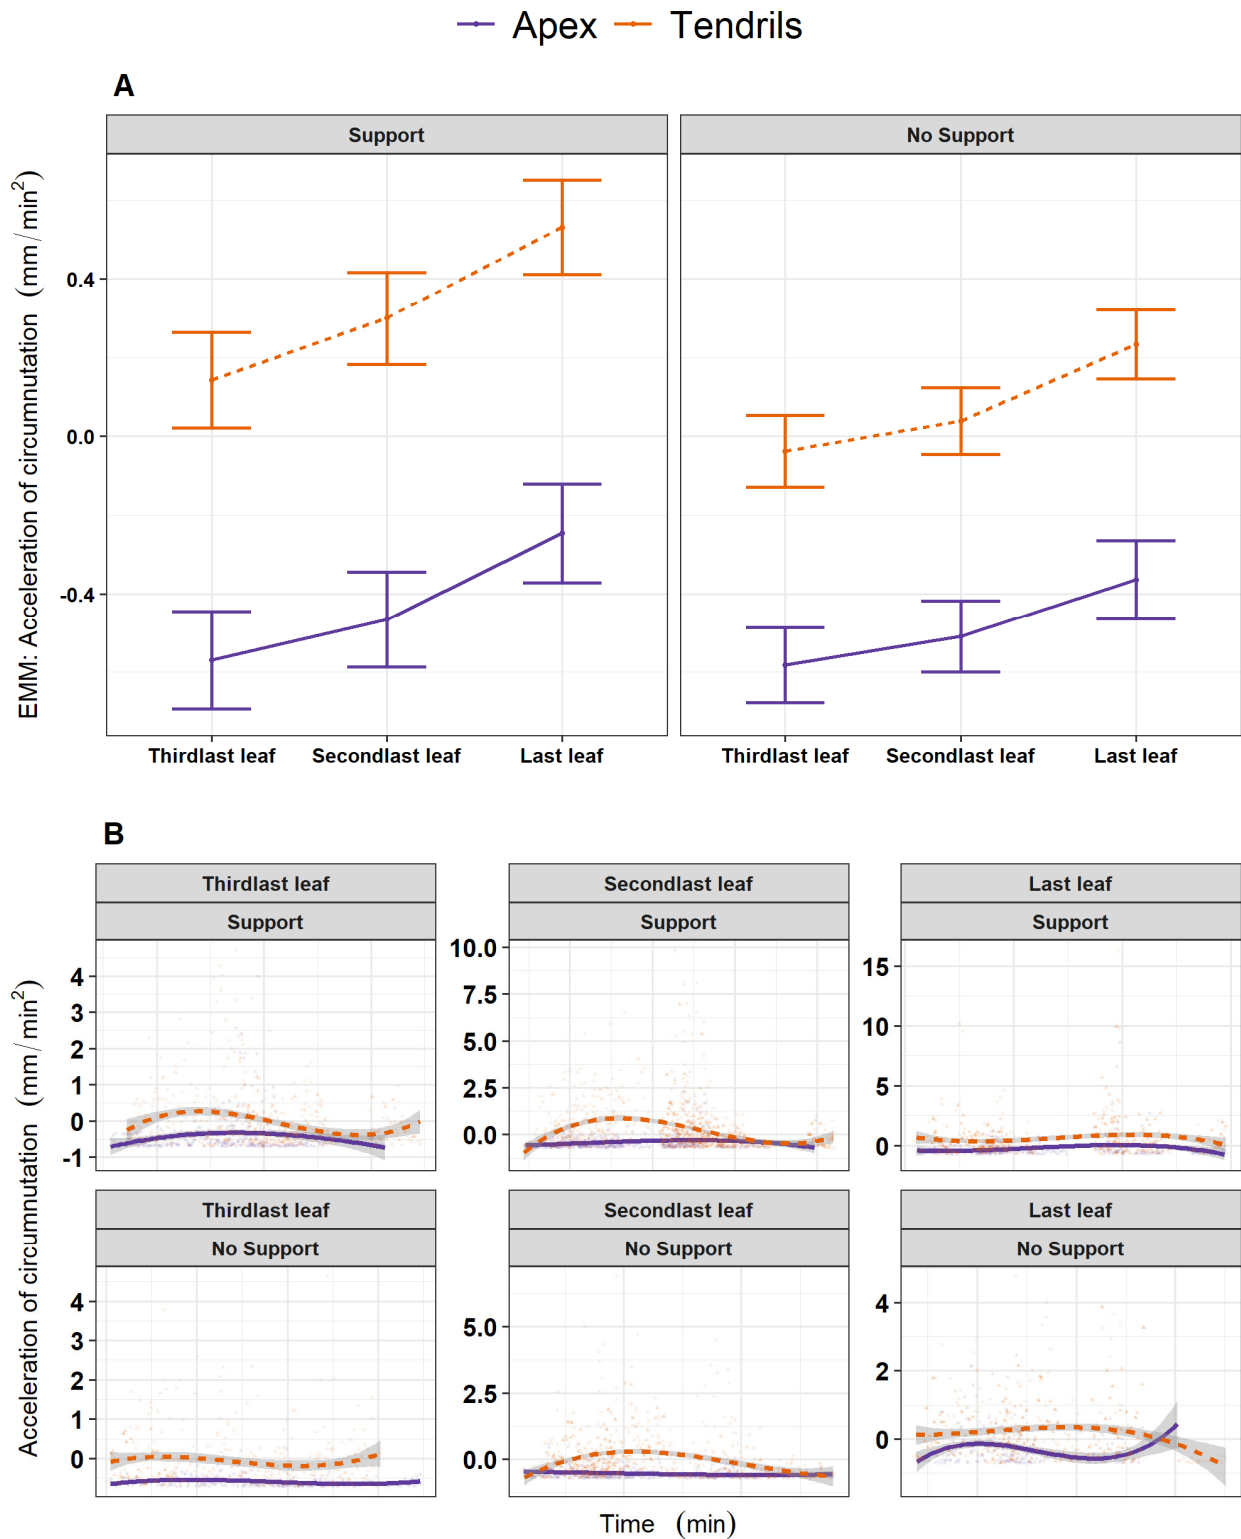

**Figure S2B.** (A) Graphical representation of post-hoc analysis for the interaction between Experimental Condition ('Stimulus,' 'No Stimulus'), anatomical landmark of the plant ('Apex,' 'Tendrils') and Leaf ('Third last,' 'Second last,' 'Last') for the estimation of the acceleration of circumnutation (scaled). (B) For descriptive purposes, the distribution of the same kinematical variable is represented as smoothed across the three last leaves of interest, controlling for the same experimental factors. Tendrils are represented with the orange-dashed line. The apex is represented with the violed-solid line.

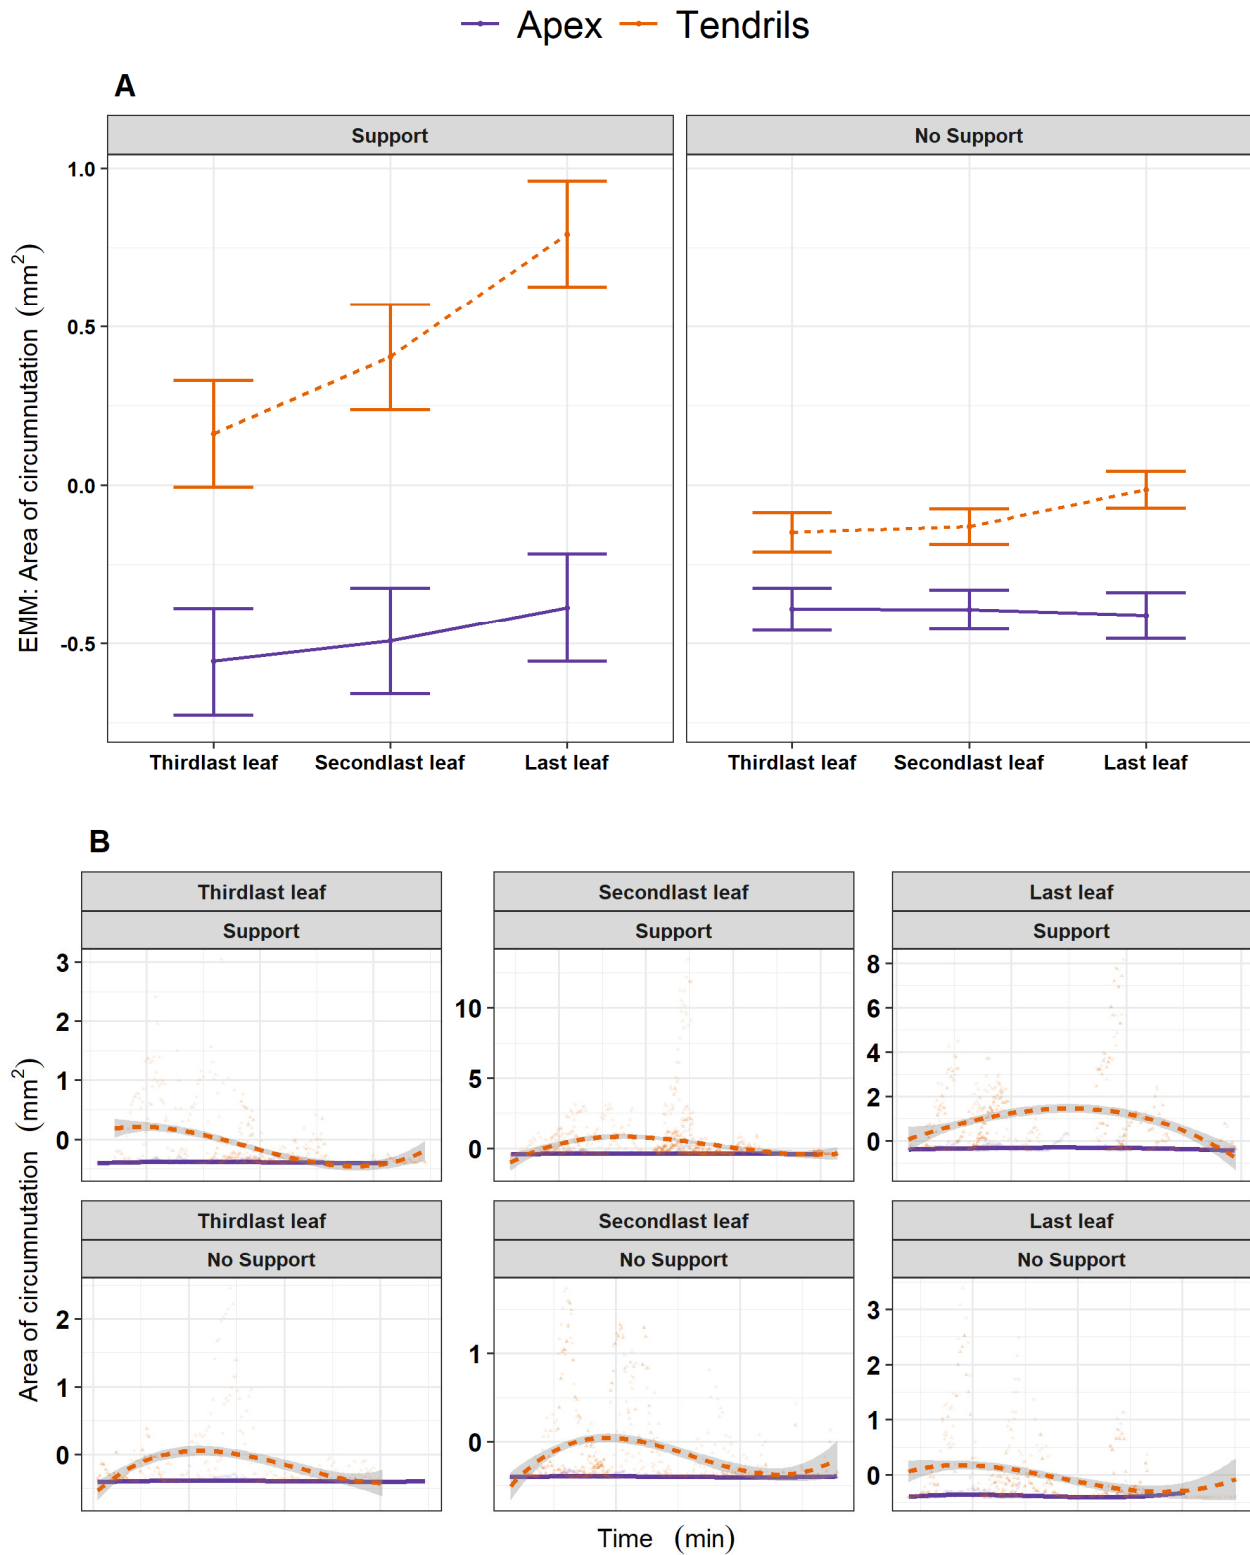

**Figure S2C.** (A) Graphical representation of post-hoc analysis for the interaction between Experimental Condition ('Stimulus,' 'No Stimulus'), anatomical landmark of the plant ('Apex,' 'Tendrils') and Leaf ('Third last,' 'Second last,' 'Last') for the estimation of the area of circumnutation (scaled). (B) For descriptive purposes, the distribution of the same kinematical variable is represented as smoothed across the three last leaves of interest, controlling for the same experimental factors. Tendrils are represented with the orange-dashed line and the apex with the violed-solid line.

**Table S3B.** Post-hoc analysis (“emmeans” contrast) for the three-parties interaction effects of the models described in Table S3-A.

|                | contrast |      |    |   |     |      | est | se     | df    | z ratio | p-value |       |
|----------------|----------|------|----|---|-----|------|-----|--------|-------|---------|---------|-------|
| Velocity ~     | Sup      | Apex | 3L | - | Sup | Apex | 2L  | -.093  | .050  | Inf     | -1.884  | .769  |
|                | Sup      | Apex | 2L | - | Sup | Apex | 1L  | -.228  | .050  | Inf     | -4.581  | <.001 |
|                | Sup      | Tend | 3L | - | Sup | Tend | 2L  | -.255  | .036  | Inf     | -7.090  | <.001 |
|                | Sup      | Tend | 2L | - | Sup | Tend | 1L  | -.438  | .034  | Inf     | -12.668 | <.001 |
|                | No       | Apex | 3L | - | No  | Apex | 2L  | -.036  | .054  | Inf     | -.664   | 1.00  |
|                | No       | Apex | 2L | - | No  | Apex | 1L  | -.071  | .059  | Inf     | -1.206  | .989  |
|                | No       | Tend | 3L | - | No  | Tend | 2L  | -.107  | .044  | Inf     | -2.446  | .374  |
|                | No       | Tend | 2L | - | No  | Tend | 1L  | -.220  | .040  | Inf     | -5.458  | <.001 |
| Acceleration ~ | Sup      | Apex | 3L | - | Sup | Apex | 2L  | -0.104 | 0.065 | Inf     | -1.592  | 0.912 |
|                | Sup      | Apex | 2L | - | Sup | Apex | 1L  | -0.220 | 0.066 | Inf     | -3.349  | 0.039 |
|                | Sup      | Tend | 3L | - | Sup | Tend | 2L  | -0.157 | 0.048 | Inf     | -3.302  | 0.045 |
|                | Sup      | Tend | 2L | - | Sup | Tend | 1L  | -0.231 | 0.046 | Inf     | -5.08   | <.001 |
|                | No       | Apex | 3L | - | No  | Apex | 2L  | -0.074 | 0.071 | Inf     | -1.035  | 0.997 |
|                | No       | Apex | 2L | - | No  | Apex | 1L  | -0.144 | 0.078 | Inf     | -1.853  | 0.788 |
|                | No       | Tend | 3L | - | No  | Tend | 2L  | -0.076 | 0.058 | Inf     | -1.323  | 0.976 |
|                | No       | Tend | 2L | - | No  | Tend | 1L  | -0.195 | 0.053 | Inf     | -3.684  | 0.012 |
| Distance ~     | Sup      | Apex | 3L | - | Sup | Apex | 2L  | -0.378 | 0.063 | Inf     | -6.003  | <.001 |
|                | Sup      | Apex | 2L | - | Sup | Apex | 1L  | -0.335 | 0.063 | Inf     | -5.318  | <.001 |
|                | Sup      | Tend | 3L | - | Sup | Tend | 2L  | 0.031  | 0.046 | Inf     | 0.679   | 1.000 |
|                | Sup      | Tend | 2L | - | Sup | Tend | 1L  | -0.374 | 0.044 | Inf     | -8.552  | <.001 |
|                | No       | Apex | 3L | - | No  | Apex | 2L  | -0.144 | 0.068 | Inf     | -2.114  | 0.613 |
|                | No       | Apex | 2L | - | No  | Apex | 1L  | -0.121 | 0.075 | Inf     | -1.618  | 0.903 |
|                | No       | Tend | 3L | - | No  | Tend | 2L  | -0.426 | 0.055 | Inf     | -7.716  | <.001 |
|                | No       | Tend | 2L | - | No  | Tend | 1L  | -0.174 | 0.051 | Inf     | -3.432  | 0.030 |
| Area ~         | Sup      | Apex | 3L | - | Sup | Apex | 2L  | -0.066 | 0.059 | Inf     | -1.12   | 0.994 |
|                | Sup      | Apex | 2L | - | Sup | Apex | 1L  | -0.105 | 0.059 | Inf     | -1.78   | 0.829 |
|                | Sup      | Tend | 3L | - | Sup | Tend | 2L  | -0.241 | 0.043 | Inf     | -5.652  | <.001 |
|                | Sup      | Tend | 2L | - | Sup | Tend | 1L  | -0.388 | 0.041 | Inf     | -9.48   | <.001 |
|                | No       | Apex | 3L | - | No  | Apex | 2L  | 0.002  | 0.064 | Inf     | 0.03    | 1.000 |
|                | No       | Apex | 2L | - | No  | Apex | 1L  | 0.018  | 0.070 | Inf     | 0.263   | 1.000 |
|                | No       | Tend | 3L | - | No  | Tend | 2L  | -0.017 | 0.052 | Inf     | -0.336  | 1.000 |
|                | No       | Tend | 2L | - | No  | Tend | 1L  | -0.117 | 0.047 | Inf     | -2.468  | 0.360 |

**Note.** Sup = Support, No = No Support; Apex = Apex; Tend = Tendril; 3L = Third last Leaf; 2L = Second last Leaf; 1L = Last Leaf. se = Standard Error, df = Degrees of Freedom.

**Table S4A.** Mean, standard deviation, and range (min, max) for the total number of circumnutations and switches across the three last leaves developed concerning Experimental Condition.

|                                     | Mean (SD)   | Min | Max |
|-------------------------------------|-------------|-----|-----|
| <b>Circumnutations (Support)</b>    |             |     |     |
| - Third last leaf                   | 33 (10.6)   | 10  | 51  |
| - Second last leaf                  | 34.1 (10.7) | 6   | 61  |
| - Last leaf                         | 19.2 (11.6) | 5   | 64  |
| <b>Circumnutations (No Support)</b> |             |     |     |
| - Third last leaf                   | 42.8 (12.1) | 11  | 70  |
| - Second last leaf                  | 48.1 (12.6) | 23  | 67  |
| - Last leaf                         | 34.8 (14.1) | 1   | 59  |
| <b>Switches (Support)</b>           |             |     |     |
| - Third last leaf                   | 4.40 (2.90) | 0   | 9   |
| - Second last leaf                  | 2.79 (1.99) | 0   | 7   |
| - Last leaf                         | 1.38 (1.30) | 0   | 4   |
| <b>Switches (No support)</b>        |             |     |     |
| - Third last leaf                   | 5.37 (4.05) | 0   | 16  |
| - Second last leaf                  | 6.12 (6.12) | 1   | 11  |
| - Last leaf                         | 4.31 (2.85) | 0   | 9   |

**Table S4B.** Results from the lmer fitted models (Type III Wald chi-square tests) investigating the interaction between Experimental Condition ('Support,' 'No Support') and Leaf ('Third last,' 'Second last,' 'Last') for the number of switch direction of circumnutations ('Clockwise' and 'Counterclockwise'). The plant was set as a random intercept for the two models.

|                                    | $\chi^2$ | df | Pr(> $\chi^2$ )   | R <sup>2</sup> |
|------------------------------------|----------|----|-------------------|----------------|
| <b>Circumnutations ~</b>           |          |    |                   |                |
| (Intercept)                        | 275.958  | 1  | <.001***          |                |
| Condition                          | 3.587    | 2  | .058 <sup>o</sup> |                |
| Leaf                               | 191.105  | 2  | <.001***          |                |
| Condition*Leaf                     | 11.335   | 2  | .003**            |                |
| - Marginal R <sup>2</sup>          |          |    |                   | .373           |
| - Conditional R <sup>2</sup>       |          |    |                   | .609           |
| <b>Switches ~</b>                  |          |    |                   |                |
| (Intercept)                        | 172.130  | 1  | < .001***         |                |
| Condition                          | 1.569    | 1  | .210              |                |
| Leaf                               | 32.173   | 2  | < .001***         |                |
| Direction                          | 0.001    | 1  | .970              |                |
| Condition*Leaf                     | 13.225   | 2  | .001**            |                |
| Condition*Direction                | 0.058    | 1  | .809              |                |
| Leaf *Direction                    | 0.664    | 2  | .717              |                |
| Condition*Leaf *Direction          | 0.340    | 2  | .844              |                |
| - Marginal delta R <sup>2</sup>    |          |    |                   | .451           |
| - Conditional delta R <sup>2</sup> |          |    |                   | .513           |

**Note.**  $\chi^2$ = chi-squared test; R<sup>2</sup>= Coefficient of determination; df: degree of freedom; <sup>o</sup> =  $p < .100$ ; \* =  $p < .050$ ; \*\* =  $p < .010$ ; \*\*\* =  $p < .001$ .

**Table S4C.** Post-hoc analysis (“emmeans” contrast) for the significant interaction effects (Experimental Condition\*Leaf) detected on the two models described in Table S4-A and Table S4-B.

|                          | estimate | SE    | df    | Z ratio | p-value |
|--------------------------|----------|-------|-------|---------|---------|
| <b>Circumnutations ~</b> |          |       |       |         |         |
| Sup 3L – Sup 2L          | 1.589    | 1.45  | 455.4 | 1.098   | .882    |
| Sup 2L – Sup 1L          | 15.727   | 1.270 | 452.7 | 7.173   | <.001   |
| Sup 3L – Sup 1L          | 17.316   | 1.53  | 459.5 | 11.310  | <.001   |
| No 3L – No 2L            | 8.689    | 3.65  | 30.5  | 2.378   | .195    |
| No 2L – No 1L            | 28.349   | 3.54  | 27.0  | 8.005   | <.001   |
| No 3L – No 1L            | 8.983    | 1.97  | 451.7 | 4.563   | <.001   |
| Sup 3L – No 3L           | -7.100   | 3.75  | 33.7  | -1.894  | .423    |
| Sup 2L – No 2L           | -12.622  | 3.53  | 26.6  | -3.577  | .015    |
| Sup 1L – No 1L           | -15.433  | 3.61  | 29.1  | -4.277  | .002    |
| <b>Switches ~</b>        |          |       |       |         |         |
| Sup 3L – Sup 2L          | .450     | .080  | Inf   | 5.647   | <.001   |
| Sup 2L – Sup 1L          | .682     | .098  | Inf   | 6.943   | <.001   |
| Sup 3L – Sup 1L          | 1.132    | .103  | Inf   | 10.956  | <.001   |
| No 3L – No 2L            | -.188    | .084  | Inf   | -2.244  | .218    |
| No 2L – No 1L            | 1.531    | .136  | Inf   | 11.278  | <.001   |
| No 3L – No 1L            | 1.344    | .143  | Inf   | 9.356   | <.001   |
| Sup 3L – No 3L           | -.211    | .133  | Inf   | -1.584  | .609    |
| Sup 2L – No 2L           | -.849    | .121  | Inf   | -6.993  | <.001   |
| Sup 1L – No 1L           | -1.095   | .143  | Inf   | -7.621  | <.001   |

**Note.** Sup = Support, No = No Support, 3L = Third last Leaf; 2L = Second last Leaf; 1L = Last Leaf. se = Standard Error, df = Degrees of Freedom.

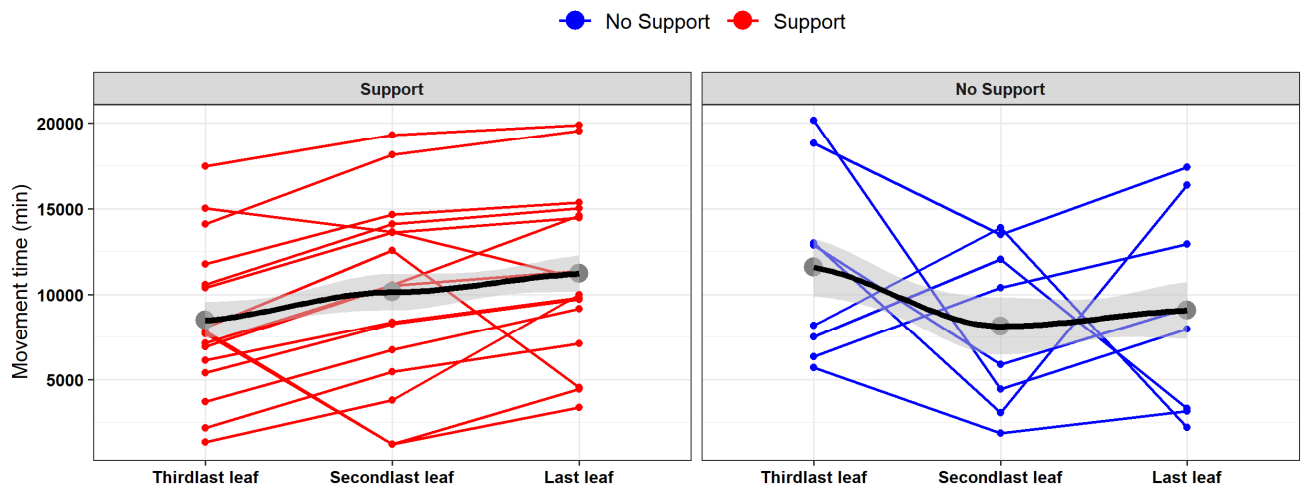

**Figure S3.** Graphical representation for the variation of the movement time across the last three leaves developed (in columns) per each Experimental Condition (in facets, 'Support' and 'No support'), controlling for individual plants (by line). Per each condition, the black dots represent the mean movement time for each leaf, with the black continuous line representing the mean smoothed variation across leaves. Plants for the 'Support' condition are represented with red-solid lines, while those for the 'No Support' condition have blue-solid lines.

**Table S5A.** Mean, standard deviation, and range (min, max) concerning movement time (min) of leaves, controlling for Experimental Condition ('Support,' 'No Support') and Leaf ('Third last,' 'Second last,' 'Last').

|                              | Mean (SD)            | Min  | Max   |
|------------------------------|----------------------|------|-------|
| <b>Condition: Support</b>    |                      |      |       |
| - Third last leaf            | 8481.7 (4528.2)      | 1359 | 17466 |
| - Second last leaf           | 10132.5 (5501.9)     | 1218 | 19299 |
| - Last leaf                  | 11208 (5016.2)       | 3369 | 19902 |
| <b>Condition: No Support</b> |                      |      |       |
| - Third last leaf            | 11578.5 (5601.5)     | 5706 | 20169 |
| - Second last leaf           | 8135.2 (4872.1) 9063 | 1860 | 13884 |
| - Last leaf                  | (6029.5)             | 2193 | 17412 |

*Note.* One day (24h) = 1440 mins, and ten days (240h) = 14400 mins.

**Table S5B.** Results from the lmer fitted models (Type III Wald chi-square tests) investigating the interaction between Experimental Condition ('Support,' 'No Support') and Leaf ('Third last,' 'Second last,' 'Last') for the movement time. The plant was set as a random intercept of the model.

|                              | $\chi^2$ | df | Pr(> $\chi^2$ ) | R <sup>2</sup> |
|------------------------------|----------|----|-----------------|----------------|
| <b>Leaf movement time ~</b>  |          |    |                 |                |
| (Intercept)                  | 24.37    | 1  | <.001**         |                |
| Leaf                         | 4.054    | 2  | .131            |                |
| Condition                    | 0.910    | 1  | .168            |                |
| Leaf *Condition              | 7.584    | 1  | .022*           |                |
| - Marginal R <sup>2</sup>    |          |    |                 | .056           |
| - Conditional R <sup>2</sup> |          |    |                 | .561           |

*Note.*  $\chi^2$  = chi-squared test; R<sup>2</sup> = Coefficient of determination; df: degree of freedom; ° =  $p < .100$ ; \* =  $p < .050$ ; \*\* =  $p < .010$ ; \*\*\* =  $p < .001$ .
